# Supplementary material for: Pressure-induced Ge2Se3and Ge3Se4crystals with low superconducting transition temperatures
Source: Royal Society of Chemistry journal article supplement (doi:10.1039/c9cp02362c), 2019-01-01
Supplement: c9cp02362c1.pdf [file c9cp02362c1.pdf]

**Supplemental Information**

**Pressure-Induced  $\text{Ge}_2\text{Se}_3$  and  $\text{Ge}_3\text{Se}_4$  Crystals with Low  
Superconducting Transition Temperatures**

Hulei Yu<sup>1</sup> and Yue Chen<sup>1,\*</sup>

*<sup>1</sup>Department of Mechanical Engineering, The University of Hong Kong,  
Pokfulam Road, Hong Kong SAR, China*

(Dated: June 21, 2019)

The superconducting transition temperature was predicted using the Allen-Dynes modified McMillan's equation [1, 2]:

$$T_c = \frac{\omega_{log}}{1.2} \exp\left[-\frac{1.04(1 + \lambda)}{\lambda - \mu^*(1 + 0.62\lambda)}\right]$$

where  $\omega_{log}$ ,  $\mu^*$ , and  $\lambda$  are the logarithmic average frequency, the Coulomb pseudopotential, and the total EPC parameter.  $\omega_{log}$  and  $\lambda$  were estimated based on the Eliashberg phonon spectral function  $\alpha^2F(\omega)$ :

$$\lambda = 2 \int_0^\infty \frac{\alpha^2F(\omega)}{\omega} d\omega$$

$$\omega_{log} = \exp\left[\frac{2}{\lambda} \int_0^\infty \frac{\alpha^2F(\omega) \log \omega}{\omega} d\omega\right]$$

A kinetic energy cut-off of 40 Ry was applied in all EPC calculations. To obtain the value of  $\lambda$ , a smearing value of 0.12 was used. Typical values of  $\mu^*$  in between 0.1 and 0.14 were used in evaluating the  $T_c$ .

TABLE S1. Superconducting transition temperatures  $T_c$  of different  $\text{Ge}_2\text{Se}_3$  and  $\text{Ge}_3\text{Se}_4$  phases under pressures.

| Compounds                              | Pressures (GPa) | Space groups | $\mu^*$ | $T_c$ (K) |
|----------------------------------------|-----------------|--------------|---------|-----------|
| $\text{Ge}_2\text{Se}_3$               | 5               | $R\bar{3}m$  | 0.1     | 1.35      |
|                                        |                 |              | 0.14    | 0.57      |
| $\text{Ge}_2\text{Se}_3$               | 10              | $P\bar{3}m1$ | 0.1     | 1.92      |
|                                        |                 |              | 0.14    | 0.96      |
| $\text{Ge}_2\text{Se}_3$               | 15              | $R\bar{3}m$  | 0.1     | 1.98      |
|                                        |                 |              | 0.14    | 0.98      |
| $\text{Ge}_3\text{Se}_4$               | 40              | $I\bar{4}3d$ | 0.1     | 4.50      |
|                                        |                 |              | 0.14    | 2.83      |
| Amorphous $\text{Ge}_2\text{Se}_3$ [3] | >20             | -            | -       | $\sim 2$  |

TABLE S2. Space groups, lattice constants, and Wyckoff positions of different Ge-Se compounds and phases at selected pressures.

| Compounds                | Pressures (GPa) | Space groups | Lattice paramters                               | Wyckoff positions          |
|--------------------------|-----------------|--------------|-------------------------------------------------|----------------------------|
| $\text{Ge}_2\text{Se}_3$ | 5               | $R\bar{3}m$  | $a = 3.660\text{\AA}$<br>$c = 27.342\text{\AA}$ | Ge 3a (0,0,0.162)          |
|                          |                 |              |                                                 | Ge 3a (0,0,0.293)          |
|                          |                 |              |                                                 | Se 3a (0,0,0.776)          |
|                          |                 |              |                                                 | Se 3a (0,0,0.561)          |
|                          |                 |              |                                                 | Se 3a (0,0,0.011)          |
| $\text{Ge}_2\text{Se}_3$ | 10              | $P\bar{3}m1$ | $a = 3.637\text{\AA}$<br>$c = 8.598\text{\AA}$  | Ge 2d (0.333,0.667,0.806)  |
|                          |                 |              |                                                 | Se 2d (0.333,0.667,0.360)  |
|                          |                 |              |                                                 | Se 1a (0,0,0)              |
| $\text{Ge}_2\text{Se}_3$ | 15              | $R\bar{3}m$  | $a = 3.586\text{\AA}$<br>$c = 25.180\text{\AA}$ | Ge 6c (0,0,0.399)          |
|                          |                 |              |                                                 | Se 3a (0,0,0)              |
|                          |                 |              |                                                 | Se 6c (0,0,0.789)          |
| $\text{Ge}_3\text{Se}_4$ | 40              | $I\bar{4}3d$ | $a = 7.547\text{\AA}$                           | Ge 12a (0.375,0,0.25)      |
|                          |                 |              |                                                 | Se 16c (0.069,0.069,0.069) |

TABLE S3. The shortest bond lengths  $L$  and the mean coordination numbers  $\bar{n}$  in  $\text{Ge}_2\text{Se}_3$  and  $\text{Ge}_3\text{Se}_4$ .  $\bar{n}_{\alpha-\beta}$  is the the mean number of nearest neighbors of  $\beta$  atoms around an  $\alpha$  atom within a distance of 2.9 Å [4]. Amorphous data were reported at ambient conditions.

|                          | Phases             | $L_{\text{Ge-Se}}$ (Å) | $L_{\text{Ge-Ge}}$ (Å) | $L_{\text{Se-Se}}$ (Å) | $\bar{n}_{\text{Ge-Se}}$ | $\bar{n}_{\text{Ge-Ge}}$ | $\bar{n}_{\text{Se-Se}}$ |
|--------------------------|--------------------|------------------------|------------------------|------------------------|--------------------------|--------------------------|--------------------------|
| $\text{Ge}_2\text{Se}_3$ | $R\bar{3}m$ 5GPa   | 2.55                   | 3.57                   | 3.43                   | 3                        | 0                        | 0                        |
|                          | $P\bar{3}m1$ 10GPa | 2.54                   | 3.64                   | 3.19                   | 6                        | 0                        | 0                        |
|                          | $R\bar{3}m$ 15 GPa | 2.65                   | 3.59                   | 3.03                   | 6                        | 0                        | 0                        |
|                          | Amorphous [4]      | 2.35                   | 2.47                   | 2.37                   | 3.21                     | 0.52                     | 0.01                     |
| $\text{Ge}_3\text{Se}_4$ | $I\bar{4}3d$ 40GPa | 2.50                   | 3.53                   | 2.92                   | 8                        | 0                        | 0                        |
|                          | Amorphous [5]      | 2.35                   | 2.48                   | -                      | 2.73                     | 1.37                     | -                        |

---

\* yuechen@hku.hk

- [1] P. B. Allen and R. C. Dynes, *Phys. Rev. B*, 1975, **12**, 905–922.
- [2] Z. Zhao, S. Zhang, T. Yu, H. Xu, A. Bergara and G. Yang, *Phys. Rev. Lett.*, 2019, **122**, 097002.
- [3] I. Berman and N. Brandt, *High Pressure Res.*, 1989, **1**, 301–305.
- [4] S. Le Roux, A. Bouzid, M. Boero and C. Massobrio, *Phys. Rev. B*, 2012, **86**, 224201.
- [5] T. Usuki, F. Araki, O. Uemura, Y. Kameda, T. Nasu and M. Sakurai, *Mater. Trans.*, 2003, **44**, 344–350.
